# Supplementary material for: Increasing participation in a vector control campaign: a cluster randomised controlled evaluation of behavioural economic interventions in Peru
Source: PubMed Central journal article supplement — BMJ Glob Health. 2018 Sep 21;3(5):e000757. doi: 10.1136/bmjgh-2018-000757 (PMC6157568; doi:10.1136/bmjgh-2018-000757), 2018-09-21
Supplement: bmjgh-2018-000757supp002.pdf [file bmjgh-2018-000757supp002.pdf]

**Aumentar la participación en una campaña de control de vectores: Una evaluación pragmática aleatoria de grupos en intervenciones de economía conductual**

Alison M Bittenheim, Associate Professor, University of Pennsylvania School of Nursing, Philadelphia Pennsylvania, USA

Valerie A Paz-Soldan, Associate Professor, Tulane University, New Orleans, Louisiana, USA

Ricardo Castillo-Neyra, Instructor, Department of Biostatistics, Epidemiology and Informatics, University of Pennsylvania Perelman School of Medicine, Philadelphia, Pennsylvania, USA

Amparo M Toledo Vizcarra, Director of Field Operations, Zoonotic Disease Research Lab, One Health Unit, School of Public Health and Administration, Universidad Peruana Cayetano Heredia, Arequipa, Peru

Katty Borrini-Mayori, Unit Director, Zoonotic Disease Research Lab, One Health Unit, School of Public Health and Administration, Universidad Peruana Cayetano Heredia, Arequipa, Perú

Molly McGuire, Research Associate, Tulane University, New Orleans, Louisiana, USA

Claudia Arevalo-Nieto, Director of Data Operations, Zoonotic Disease Research Lab, One Health Unit, School of Public Health and Administration, Universidad Peruana Cayetano Heredia, Arequipa, Perú

Kevin G Volpp, Professor, University of Pennsylvania Perelman School of Medicine, Philadelphia, Pennsylvania, USA

Dylan S Small, Professor, University of Pennsylvania Wharton School, Philadelphia, Pennsylvania, USA

Jere R Behrman, Professor, University of Pennsylvania Department of Economics School of Arts and Sciences, Philadelphia, Pennsylvania, USA

Cesar Náquira-Velarde, Research Professor, Universidad Peruana Cayetano Heredia, Lima, Perú

Michael Z Levy, Associate Professor, Department of Biostatistics, Epidemiology and Informatics, University of Pennsylvania Perelman School of Medicine, Philadelphia, Pennsylvania, USA

Correspondencia a: Alison M Bittenheim, University of Pennsylvania School of Nursing, 416 Fagin hall 418 Curie Blvd, Philadelphia PA 19104. +1 215 573 5314, [abutt@nursing.upenn.edu](mailto:abutt@nursing.upenn.edu)

Palabras clave: Economía conductual, control de vectores, enfermedad de Chagas, Perú

## RESUMEN

**Objetivo:** Determinar la eficiencia de estrategias basadas en economía conductual en el aumento de participación en una campaña de control de vectores, comparada con la práctica actual

**Diseño:** Ensayo pragmático controlado de grupos aleatorios

**Entorno:** Arequipa, Perú

**Participantes:** 4922 hogares

**Intervenciones:** Los hogares fueron seleccionados aleatoriamente a uno de cuatro brazos: planificación previa, reclutamiento de líderes, loterías supeditadas de grupo, o control.

**Medidas Principales:** Participación (permitir que la casa sea fumigada con insecticida) durante la campaña de control de vectores

**Resultados:** En análisis de tipo intención de tratamiento, ninguna de las intervenciones aumentaron la participación comparados al control (proporción de probabilidad ajustada (pPA) de planificación previa 1.07 (95% CI 0.87 a 1.32); reclutamiento de líderes pPA 0.95 (95% CI 0.78 a 1.15); loterías de grupo pPA 1.12 (95% CI 0.89 to 1.39)). Las intervenciones no mejoraron la eficiencia de la campaña (minutos adicionales necesarios para fumigar los hogares basados en regresiones de ecuaciones de estimación generalizadas (GEE por sus siglas en inglés): planificación previa: 1.08 (95% CI -1.02 a 3.17); reclutamiento de líderes 3.91 (95% CI 1.85 a 5.97); loterías de grupo 3.51 (95% CI 1.38 a 5.64)); ni aumentó las posibilidades que los hogares fueran fumigados en una etapa más temprana del ciclo de la campaña (planificación previa pPA 0.94 (95% CI 0.76 a 1.25); reclutamiento de líderes pPA 0.68 (95% CI 0.55 a 0.83); loterías de grupo pPA 1.19 (95% CI 0.96 a 1.47)). Un análisis post hoc sugiere que la

planificación previa aumentó los chances de participación en comparación con el control entre los hogares que se habían negado a participar previamente. (pPA 2.50 (95% CI 1.41 a 4.43)).

## **Conclusiones**

Conseguir altos niveles de participación de hogares es fundamental para muchos esfuerzos de prevención de enfermedades. Nuestro ensayo no fue exitoso en aumentar la participación comparado con la campaña existente. Este ensayo destaca los retos persistentes de los experimentos de campo al igual que lecciones acerca del proceso de diseño de intervenciones. Particularmente destaca el entendimiento de los obstáculos para la participación desde el punto de vista del comportamiento.

**Registro del Ensayo:** Asociación Económica Americana AEARCTR-0000620

## INTRODUCCIÓN

La enfermedad de chagas es una enfermedad devastadora y la enfermedad parasítica más importante y de elevada carga en las Américas.<sup>1-4</sup> Actualmente, entre 6 y 8 millones de personas, incluyendo 192,000 peruanos, están infectados con *Trypanosoma cruzi*, el agente etiológico de la enfermedad.<sup>5-6</sup> Encuestas serológicas sobre el efecto de la enfermedad de Chagas en Arequipa, Perú, en donde se encuentra nuestro estudio, revelaron una prevalencia de 4.7% entre los niños de educación primaria en tres distritos de la ciudad.<sup>7</sup> La prevalencia fue similar en adultos en una encuesta serológica comunitaria.<sup>8</sup> *T. cruzi* es usualmente transmitida por medio de contacto con las heces de insectos triatomíneos, los cuales albergan el parásito en su tubo digestivo cuando están infectados. Las infecciones agudas tienen una probabilidad de 20-30% de progresar a formas cardíacas o digestivas de enfermedad crónica de Chagas, las cuales son difíciles de tratar y pueden ser fatales.

Las campañas puerta a puerta de rociado interno con efecto residual son un componente crítico del programa de prevención y vigilancia para la enfermedad de Chagas, tal como otras enfermedades transmitidas por vectores como la malaria, el dengue, Zika y chikungunya.<sup>9</sup>

Cuando son acopladas con comportamientos simples y económicos, el rociado interino con efecto residual puede disminuir drásticamente o eliminar la presencia de insectos que actúan como vectores en los hogares, protegiendo a los miembros del hogar de la enfermedad.<sup>10-12</sup>

Desde los 1990s, la iniciativa del Cono Sur se ha enfocado en la eliminación de *Triatoma infestans*, el vector principal de *T. cruzi* en América del Sur.<sup>11</sup> La Iniciativa del Cono del Sur es un esfuerzo de múltiples países para eliminar la enfermedad de Chagas en el área sur de Sudamérica. Los Ministerios de Salud implementan planes y actividades a nivel nacional o local, y la Organización Panamericana de Salud coordina la divulgación de información y evaluación

de impacto de estas actividades. La intervención primaria de la iniciativa del Cono Sur es la campaña puerta a puerta de rociado con insecticidas de efecto residual para eliminar el insecto vector. Consecuentemente a esta intervención, tres países (Chile,<sup>13</sup> Brasil,<sup>14</sup> and Uruguay<sup>15</sup>) fueron declarados libres de transmisión de *T. cruzi* por medio de *T. infestans*. El control de este vector en el sur de Perú<sup>7 16</sup> y gran parte de Bolivia<sup>17</sup>, ha sido más complicado, lo cual es en parte atribuible a los niveles bajos de participación de hogares en la campaña puerta a puerta de control de vectores.<sup>18 19</sup>

En el caso de la enfermedad de Chagas, (tal como para otras enfermedades transmitidas por vectores como Zika y Dengue<sup>20</sup>) la participación deficiente en las campañas perjudica la efectividad de esfuerzos de control basados en evidencia. Hasta la fecha, varias campañas de control de vectores han dependido de promociones de salud convencionales y marcos de cambios en comportamientos de salud que asumen que los individuos forman sus intenciones conductuales basados en una valoración de costos y beneficios y que actúan constantemente en su propio beneficio.<sup>21 22</sup> Recientemente, investigadores de salud y desarrollo se han dirigido al campo de economía comportamental en busca de nuevas alternativas para facilitar cambios comportamentales.<sup>23</sup> Estos enfoques reconocen los prejuicios comunes y atajos mentales que influyen nuestras decisiones, incluyendo el sesgo actual (la tendencia de darle más valor a los costos y beneficios actuales que a aquellos del futuro),<sup>24 25</sup> limitaciones en recursos de atención,<sup>26-28</sup> y el poder de normas sociales.<sup>29 30</sup>

Usando estos y otros principios, investigadores han diseñado estrategias e intervenciones que aprovechan estos sesgos y atajos mentales para conseguir cambios comportamentales que mejoren la salud. Por ejemplo, dispositivos de compromiso, los cuales ofrecen la oportunidad de comprometerse a un comportamiento en avance, ayudan a contrarrestar los sesgos actuales e

inconsistencias de dinámicas por medio de la limitación voluntaria de comportamientos futuros que ayudan a que los intereses a largo plazo sean priorizados, aún en situaciones en las que se presentan alternativas tentosas en el futuro. Estos dispositivos de compromiso han contribuido a programas exitosos de pérdida de peso y dieta saludable en los Estados Unidos,<sup>31-33</sup> tal como a programas de ahorros en Filipinas<sup>34</sup> y Kenya.<sup>35</sup> Instrucciones de planificación, los cuales promueven la formación de un plan para crear un comportamiento deseado, como “Cuando la situación X aparece, se implementará la respuesta Y,” contrarrestan el sesgo actual, solucionan las limitaciones de atención y han demostrado mejorar la participación electoral,<sup>36</sup> vacunación de influenza,<sup>37</sup> comportamientos de higiene oral,<sup>38</sup> y pérdida de peso.<sup>39</sup> Usar líderes de opinión (quiénes influyen las actitudes, creencias y comportamientos de sus iguales) para promover cambios en comportamiento aprovecha la importancia de las normas sociales, una propuesta que ha sido exitosa en la prevención de VIH y la vacunación en contra de la Influenza.<sup>40 41</sup>

Observaciones comportamentales han generado un interés considerable en el uso y la estructura de incentivos financieros para motivar cambios comportamentales relacionados a la salud.<sup>32 33 42-</sup>

46

Las loterías contrarrestan el sesgo actual al brindar una recompensa inmediata y tangible a comportamientos orientados hacia el futuro, y han demostrado ser efectivos para la promoción de adherimiento a medicaciones,<sup>43</sup> pérdida de peso,<sup>32 33</sup> reducción de colesterol,<sup>47</sup> e inmunización<sup>48</sup> en los Estados Unidos, al igual que comportamientos para las pruebas de VIH en Lesoto.<sup>49</sup>

Loterías de grupo, en las que el grupo es elegible para un premio sólo si todos los miembros participan en el comportamiento deseado, adicionalmente aprovechan arrepentimiento anticipado, normas sociales y presión de grupo.<sup>50 51</sup> Mientras planteamientos de economía comportamental han conseguido resultados convincentes para comportamientos individuales en

circunstancias controladas, pocos estudios han sido conducidos en intervenciones de salud global a gran escala como las campañas de control de vectores.<sup>23 42</sup>

## **Objetivo**

El propósito de este estudio fue evaluar tres intervenciones novedosas que utilizan conocimientos de economía comportamental para aumentar la participación en la campaña de control de vectores de la enfermedad de Chagas en Arequipa, Perú. Nosotros diseñamos tres intervenciones destinadas a aumentar la participación en la campaña de control de vectores en Arequipa, y evaluamos sus efectividades comparadas con la campaña actual en un ensayo pragmático controlado de grupos aleatorios de casi 5,000 hogares.

## **MÉTODOS**

### **Ubicación del estudio**

El estudio fue conducido en Arequipa, una ciudad de casi un millón habitantes en el sur de Perú. Los ciclos de transmisión de *T. cruzi* fueron establecidos en Arequipa en los años 2000. Encuestas serológicas conducidas en 2004 en comunidades más pobres revelaron que el 5.3% de los niños habían sido infectados.<sup>52 53</sup> Un programa de aplicación puerta a puerta de insecticida, el cual comenzó en 2003, ha tenido muy buen éxito, tal como muestra la disminución de índices de infestación a través de la ciudad.<sup>18</sup> La campaña de control vectorial del Ministerio de Salud tiene tres fases. Posteriormente a una fase inicial de encuesta, la fase de ataque consiste en la aplicación de insecticida (usualmente Deltametrin) por personal de control de vectores, quienes visitan las localidades escogidas para estas medidas de control y aplican este insecticida en casas y áreas peri domésticas a lo largo de dos ciclos (Ciclo 1 y Ciclo 2) con intervalos de 6 meses. Durante esta fase de ataque las casas son visitadas primero por un promotor de salud del Ministerio de Salud un día antes del tratamiento para informar al hogar de la campaña y acerca

de la preparación del hogar para el rociado (i.e., los muebles grandes tienen que ser separados de las paredes, y la comida y utensilios tienen que ser cubiertos para estar fuera del alcance del insecticida). Los promotores también confirman la voluntad del hogar para tener el lugar preparado y programar una cita para el día siguiente. En el día del tratamiento, el personal de control de vectores gastan en promedio 90 minutos rociando el hogar. Luego del tratamiento, se les pide a los miembros del hogar que ventilen la casa por 2-3 horas. El Ciclo 2 de la fase de ataque es llevado a cabo de la misma manera que el Ciclo 1, aproximadamente seis meses después. Para efectos óptimos de la campaña, todos los hogares son presuntos a participar en ambos ciclos. Esto asegura que cualquier huevo que haya eclosionado y estadios ninfales que hayan sobrevivido al primer rociado sean eliminados durante el segundo rociado.

Aproximadamente seis meses después de la ejecución del Ciclo 2 de la fase de ataque, las localidades entran a la tercera fase de la campaña, un periodo extendido de vigilancia pasiva y activa por re-infestación de insectos vectores. Nuestras intervenciones fueron diseñadas para aumentar la participación en la fase de ataque de la campaña.

## **Muestra**

Los participantes elegibles en el ensayo fueron residentes del Distrito Alto Selva Alegre de Arequipa que viven en localidades seleccionadas por el Ministerio de Salud para el rociado de insecticida basados en niveles de infestación de insectos vectores. Este distrito fue escogido como nuestro sitio de estudio basados en el tiempo de la campaña. Alto Selva Alegre es un distrito heterogéneo que incluye localidades urbanas y peri urbanas, con una población estimada de 82,412<sup>54</sup> en aproximadamente 15,000 hogares. Antes del rociado del distrito, miembros de la campaña del Ministerio de Salud evaluaron los niveles de infestación de cada localidad con datos de encuestas previas y decidieron conducir rociados generales (tratamiento de todos los hogares)

en 22 localidades con 2% o más de hogares infestados, y rociados focales (tratamiento de hogares infestados y aquellos adyacentes a las casas afectadas) en el resto de localidades con menos de 2% de hogares infestados. Nuestra muestra de ensayo incluyó todos los hogares en las localidades seleccionadas (5036 hogares), o 38% de los hogares en Alto Selva Alegre. Todos los hogares fueron seleccionados para participación en el Ciclo 2, independientemente de la participación en el Ciclo 1. El ensayo de campo fue conducido de Marzo a Septiembre 2015 durante el Ciclo 2 de la aplicación de insecticida en este distrito.

### **Intervenciones**

Basados en un previo trabajo formativo <sup>19 55</sup> y empleando un enfoque de diseño comportamental, desarrollamos tres intervenciones para aumentar la participación de hogares comparado a la campaña existente: planificación previa, reclutamiento de líderes de cuadra, y loterías de grupo contingentes. Mientras todas las intervenciones tratan la baja necesidad percibida de la campaña contra la enfermedad de Chagas (un claro hallazgo de nuestro trabajo formativo<sup>55</sup>) cada una fue conductualmente diseñada para enfrentar barreras a la participación de varias maneras. El diseño conductual es un planteamiento sistemático para definir un comportamiento meta, diagnosticar embotellamientos comportamentales que previenen el consumo o involucramiento en el comportamiento, y usar este diagnóstico para diseñar y probar intervenciones informadas por comportamientos.<sup>56</sup> Nuestro proceso de diseño comportamental, incluyendo justificaciones detalladas para el diseño de intervenciones, intervenciones que fueron propuestas pero rechazadas, y cambios a los diseños originales son descritos en su totalidad en otro lugar.<sup>57</sup>

Hemos resumido estas intervenciones aquí:

La primera intervención, la planificación previa, fue intencionada para enfrentar las dificultades percibidas en la preparación de casas para el rociado y la programación de rociado en una hora

conveniente para el hogar.<sup>19 55</sup> En nuestras observaciones de campañas previas, las brigadas de rociado a menudo llegaban a los hogares para el tratamiento y encontraron que los miembros del hogar no recordaban la cita y que tampoco habían preparado la casa. Esto resultaba en la espera para que el hogar completara la preparación o en proseguir con la siguiente casa en el horario de rociado, sacrificando la eficiencia de la campaña. En la intervención de planificación previa a los hogares les eran dados la oportunidad de programar el rociado varios días antes durante un margen de tiempo conveniente de 2 horas, y de realizar un plan para su hogar basado en este compromiso. Instrucciones de planificación (en forma de un imán para refrigerador con espacio para escribir los planes) también fueron ofrecidos. Las instrucciones de planificación fueron intencionadas para ayudar a los hogares a hacer y seguir los planes de mover los muebles, preparar el hogar y que sirva como recuerdo de la hora de la cita.

La segunda intervención, el reclutamiento de líderes de cuadra, fue diseñado para resolver la desconfianza de la campaña a su personal, y a la falta de conocimiento acerca de la participación de sus vecinos en la campaña, dos temas que emergieron claramente en nuestro trabajo formativo.<sup>19 55</sup> Los líderes comunitarios oficiales (promotores de salud entrenados por el Ministerio de Salud, líderes de cuadra y oficiales electos de la comunidad) y líderes comunitarios informales (dueños de tiendas, coordinadores de guarderías) fueron reclutados por el equipo del estudio, atendieron una sesión de entrenamiento, recibieron polos promocionales, un portafolio, una tarjeta prepago para llamadas y los mismos materiales educativos utilizados por el equipo del estudio. Los reclutadores fueron asignados a la promoción de la campaña a 10-12 hogares en su cuadra por medio de visitas múltiples, se les pidió que usaran sus camisetas regularmente, y que compartieran la información acerca de las tasas de participación en la localidad. Esta intervención aprovechó la investigación previa acerca del poderoso papel que las

normas descriptivas y cautelares pueden tener en la formación de comportamientos <sup>29</sup> y en la influencia particular de los líderes de opinión en las localidades. <sup>40 41</sup>

La tercera intervención, las loterías contingentes de grupos, combatieron los costos percibidos de la participación (tiempo, inconveniencia) y motivaron a los vecinos a comunicarse entre ellos acerca de la participación en la campaña <sup>19 55</sup> Los hogares fueron asignados a grupos de lotería de 5-7 hogares contiguos (normalmente a lo largo del mismo lado de la cuadra). Los grupos de lotería fueron asignados aleatoriamente a un número de lotería del 1 al 45. Para evitar las inquietudes acerca de la probabilidad de fraude en las loterías, usamos los resultados de la lotería nacional de una fecha seleccionada semanas antes. Si el número del grupo era uno de los 7 seleccionados en la lotería nacional en esta fecha (probabilidad de ganar= 16.7%), cada hogar en el grupo que había participado en la campaña recibió un cupón para una ferretería local (valor \$17; valor previsto \$2.84 ( $\$17 \times 16.7\%$ ) condicional en la participación individual del hogar. Si el 100% de los hogares en el grupo habían participado, todos los hogares en el grupo recibieron un cupón para la ferretería del doble del valor individual (\$34; valor previsto \$5.68 ( $\$34 \times 16.7\%$ ) condicional en que todos los hogares del grupo hubieran participado). Los incentivos monetarios pueden ser estrategias efectivas para el cambio de comportamientos ya que hacen los beneficios futuros, intangibles y probabilísticos de un comportamiento más tangible e inmediato. Las loterías también contrarrestaron la tasa de negligencia base, ya que las personas se enfocan más en el numerador (el valor del premio) y prestan menos atención al denominador (la probabilidad de ganar). Implementamos una lotería de grupos en vez de loterías individuales para aprovechar la presión de grupo.

Para las tres intervenciones, el equipo de investigación llevó a cabo las actividades que suplementaron la campaña existente (e.g., notificar a los hogares acerca de la lotería, programar

las citas anticipadamente, y reclutar y entrenar los a líderes de la comunidad). El personal de la campaña del Ministerio de Salud llevó a cabo la campaña usual a través de todas las intervenciones y de los grupos de control. Tal como se ha colaborado en distritos tratados previamente en la campaña, apoyamos en la promoción de la campaña a través de todos los brazos del estudio.

### **Diseño del Estudio**

Evaluamos el impacto de las intervenciones en la participación de hogares usando un ensayo pragmático controlado de grupos aleatorios. El diseño de grupos en sectores fue seleccionado como más viable para la entrega de intervenciones y el más apropiado para minimizar los efectos de derrame y contaminación.

Dividimos el área de estudio entre 56 sectores de aproximadamente 80-100 hogares usando un algoritmo K-means. Los sectores no representan ninguna unidad geográfica, de salud pública, política o social. Estos sectores fueron divididos entre 14 grupos y se formaron cuartetos entre sectores parecidos entre sí; dentro de cada cuarteo, los sectores fueron aleatoriamente asignados a uno de los cuatro brazo (tres brazos intervención y un brazo control), resultando en 14 sectores asignados a cada brazo del ensayo. Para balancear los sectores calculamos la distancia Mahalanobis entre los sectores basados en dos variables al nivel de sectores (infestación y participación en el ciclo de la campaña de rociado seis meses atrás) y asignamos pesos a estas variables observadas.<sup>58 59</sup>

Para estimar los pesos, usamos de datos de las campañas de rociado previas en la ciudad de Arequipa para construir un modelo de regresión logístico y estimar el impacto de infestación de la campaña previa y la participación de la campaña previa sobre la participación en una campaña subsecuente. Los coeficientes potenciados de este modelo fueron los pesos usados para el

algoritmo de balanceo de sectores. Las asignaciones aleatorias fueron llevadas a cabo por miembros del equipo que no estaban directamente envueltos en la entrega de intervenciones o colección de datos. El personal del Ministerio de Salud (promotores y personal de control de vectores) no fueron notificados acerca de la asignación, pero no fueron cegados en cuanto a esta condición dadas sus interacciones con hogares en diferentes brazos del estudio. El estudio fue aprobado por el Comité de revisión institucional de la University of Pennsylvania, Tulane University, y la Universidad Peruana Cayetano Heredia. Obtuvimos una exención de consentimiento informado para la participación en el estudio evaluando las tres nuevas intervenciones comparadas con la campaña usual. Esta exención no afectó ni cambió el proceso usual del Ministerio de Salud para obtener consentimiento para rociar los hogares con insecticida, ni limitó el derecho del hogar para rehusar una respuesta a las encuestas de campaña o rehusar a la aplicación de insecticida.

### **Colección de Datos**

Condujimos el ensayo de campo durante el Ciclo 2 de la fase de ataque en la campaña (Marzo-Septiembre 2015). A pesar de que nuestro estudio fue diseñado originalmente para mejorar la participación en el Ciclo 1 de la fase de ataque, el calendario de la campaña (el cual no controlamos) dictó que realizáramos el ensayo durante el Ciclo 2. A medida que los promotores del Ministerio de Salud y el personal de control de vectores y el equipo de nuestro estudio procedían a través del sitio de estudio, nosotros registramos las visitas de la campaña a cada casa, incluyendo la participación en el Ciclo 2. Para los hogares que rehusaron tratamiento, las razones para el rechazo fueron registrados en un instrumento estandarizado. Los procedimientos de recolección de datos fueron similares a estudios previos en los que hemos acompañado y apoyado a los empleados del Ministerio de Salud durante las varias etapas. <sup>8 18 19 55 60</sup>

Combinamos los datos del Ciclo 2 de la campaña y de participación en un conjunto de datos singular para análisis. Para apoyar la fidelidad de las medidas y para una mejor interpretación de los datos, también recolectamos datos acerca del reclutamiento de líderes de cuadra, la distribución de premios de las lotería y el reembolso de los cupones y, en una submuestra de hogares en el ensayo, la medida de conocimiento de y respuestas a las diferentes intervenciones.

## **Resultados**

El resultado primario fue una medida binaria de la participación de hogares en el Ciclo 2 en la campaña de aplicación de insecticida con efectos residuales. Las propiedades incluidas en mapas de la campaña fueron categorizadas en el campo como tratadas, de rechazo (el hogar se rehusó a permitir que la campaña rociara la casa), o cerradas (lo que significa que ningún miembro de la familia respondió a la llamada en la puerta durante las visitas de la campaña). Dicotomizamos el estado de los hogares entre participantes (tratados) o no participantes (de rechazo y cerrados). El estado de participación en los hogares fue evaluado y registrado por el personal de la campaña y del estudio en listas de los hogares en cada visita, incluyendo visitas conducidas durante los esfuerzos de “recuperación de la campaña” en el mes después de la fase de ataque. Para la finalidad de este estudio, el resultado de interés fue el último valor de participación registrado. También registramos dos valores secundarios relacionados a la eficiencia de la campaña: el número de minutos requeridos para completar la aplicación del insecticida (calculado al sustraer la hora de inicio de la hora final), y si los hogares participantes fueron tratados durante el pase inicial de la campaña por la localidad o durante una visita ulterior para ponerse al día. Esto fue evaluado con base en la fecha de tratamiento.

## **Tamaño de muestra y métodos estadísticos**

Un tamaño de muestra *a priori* de 5600 hogares (1400 por brazo) fue calculado para proveer 88.5% poder para detectar una diferencia en la participación de 11 puntos porcentuales, asumiendo una participación como punto de referencia de 66% (tal como se observó en un distrito previamente rociado)<sup>19</sup>, un valor alfa de 0.5, teniendo en cuenta la naturaleza sectorial de esta muestra. El mínimo efecto detectable de 11 puntos porcentuales fue determinada como suficiente magnitud para tener significado epidemiológico y relevante para la campaña de control en curso del Ministerio de Salud.<sup>61</sup>

Los efectos potenciales en la participación por brazo de intervención fueron evaluados por medio de una prueba Pearson de chi squared, con un valor crítico corregido con Bonferroni de  $0.5/6 = 0.0083$  para considerar por 6 comparaciones en dos vías de los cuatro brazos. Luego estimamos el efecto marginal promedio de cada estrategia usando ecuaciones de estimación generalizadas.

Nosotros adaptamos un modelo logístico de ecuaciones de estimación generalizadas con una matriz no estructurada para tomar en cuenta la correlación de casas entre el mismo sector.<sup>62</sup>

Teníamos 56 sectores en total, con 14 sectores por cada brazo, y entre 90 y 180 hogares en cada sector. El modelo incluyó dos covariantes pre-establecidas al nivel del hogar: la infestación en el hogar durante el Ciclo 1 (infestado, no infestado) y estado de participación (tratada, de rechazo, cerrada). No incluimos ninguna variable al nivel sector en el modelo logístico de ecuaciones generalizadas. Los sectores fueron balanceados tal como se describió anteriormente. La estrategia de estimación resulta en errores estándares robustos y la inclusión de infestaciones previas y estado de participación de cada hogar del Ciclo 1 como covariantes resuelve cualquier correlación en la participación entre el hogar a largo plazo, lo cual puede ser asociado con efectos fijados en el sector que no son observados a los cuales los hogares responden.

Condujimos un análisis pre-establecido de intención de tratar con todos los hogares elegibles, tal

como un análisis por protocolo pre establecido, restringido a los hogares que recibieron una visita de campaña.

### **Análisis auxiliares y exploratorios**

Durante el ensayo en Alto Selva Alegre, el Ministro de Salud inició la campaña de rociado en un distrito cercano, Cerro Colorado. Esto nos dió la oportunidad en ensayar por lo menos una intervención en comparación con la campaña usual durante el Ciclo 1. En colaboración con el Ministerio de Salud, quienes estaban interesados en una ampliación de la intervención más efectiva, seleccionamos la intervención de lotería para ensayar en Cerro Colorado previo a la finalización del ensayo central en Alto Selva Alegre. El brazo de lotería fue escogido dado al interés en su potencial para aumentar la participación, pero debido a preocupaciones en cuanto a su viabilidad, aceptabilidad y ampliación. 1,610 hogares en 17 sectores en Cerro Colorado fueron aleatorizados para la lotería o control para el Ciclo 1 de la fase de ataque usando los mismos procedimientos que en el ensayo central, y datos de resultado de campaña similares fueron recolectados en estos hogares.

También evaluamos dos resultados secundarios relacionados con la eficiencia general de la campaña: Condicional a que fueran rociadas, evaluamos si la casa fue rociada durante el pase inicial a través de la localidad o durante una fecha para ponerse al día o una visita de campaña durante un fin de semana (como sustituto para la comodidad en el proceso de rociado del hogar) y el número de minutos requerido para completar la aplicación del insecticida (como sustituto para que tan bien preparada estaba el hogar para el rociado). Usamos una regresión lineal con ecuaciones de estimación generalizada para comparar el número de minutos requeridos para rociar el hogar y una regresión de adaptación logística con ecuaciones de estimación generalizada para comparar el tiempo del rociado (la inicial o recuperación/fin de semana) a

través de los brazos de tratamiento. Análisis secundarios fueron realizados usando análisis de intención de tratar y análisis de muestras por protocolo; los resultados del análisis de intención de tratar son descritos a continuación. Realizamos un análisis exploratorio post-hoc de la participación por brazo de tratamiento, únicamente para aquellos hogares en Alto Selva Alegre que habían rechazado la participación en el Ciclo 1. Este análisis post-hoc utilizó una adaptación de regresión logística con ecuaciones de estimación generalizadas pero no incluyó la previa participación como co-variante. Las medidas del proceso y fidelidad, razones para rechazo a la participación, y las respuestas de los hogares a las intervenciones de campaña fueron tabuladas usando estadísticas descriptivas apropiadas. Todos los análisis fueron llevadas a cabo usando Stata V 15.0.

## **RESULTADOS**

Aleatorizamos 4,974 hogares elegibles de 22 localidades en 14 sectores a los brazos de tratamiento (Figura 1). Excluimos 48 casas perdidas a seguimiento (para el cual no tenemos una medida de resultado) y 4 casas deshabitadas, nuestro análisis de intención de tratar incluyó 4,922 hogares. Para el análisis por protocolo, excluimos otras 556 casas que no recibieron una visita de campaña. Las características base de hogares fueron en gran parte comparables en los diferentes brazos de tratamiento en las muestras de intención de tratar y por protocolo (Tabla 1). Una excepción fue la proporción notablemente alta de lotes vacantes en el brazo de reclutamiento de líderes (4.1% vs. 0.1%-0.2% en los otros brazos). Las tasas de participación en el Ciclo 1 a través de los brazos de tratamiento fueron 82.8% (control), 82.8% (planificación previa), 78.7% (reclutamiento de líderes de grupo) and 81.8% (lotería de grupos).

### **Participación por brazo de tratamiento**

La participación en el Ciclo 2 fue alta (82.2%) en el área de estudio (Tabla 2), con poca diferencia entre brazos del estudio: 1052/1273 (82.6%) en el control; ; 1057/1267 (83.4%) en la planificación previa; 930/1180 (78.8%) en el reclutamiento de líderes de grupo; y 1005/1202 (83.6%) en las loterías de grupos contingente. Las pruebas de chi-squared de Pearson sugieren una participación menor en el brazo de reclutamiento de líderes de cuadra en comparación con la planeación en avance las loterías de grupo en la muestra de intención de tratar, y participación más baja en comparación con todos los otros brazos en la muestra de por protocolo (Tabla 2). En modelos de regresión estimando participación y controlando las covariantes, ningún brazo de intervención fue significativamente diferente al brazo de control en los análisis de la intención de tratar o en los por protocolo (Tabla 3).

Tal como esperamos y similar a nuestro trabajo previo, los coeficientes en las variables de control de nuestros análisis pre establecidos muestran que la participación fue significativamente más alta (proporción de probabilidad ajustada: 8.85, 95% CI 4.43 a 17.70) en hogares en la muestra de intención de tratar que habían sido rociados y en los que se habían encontrado insectos, y también en hogares que fueron rociados pero no estaban infestados en el Ciclo 1 (pPA: 4.49, 95% CI 3.33 a 6.06) Los hogares que no estaban habitados durante el Ciclo 1 también tenían mayores tendencias a ser tratados (pPPA: 2.19, 95% CI 1.33 a 3.62), y los lotes registrados como espacios públicos en el primer tratamiento tendían a no ser tratados durante el Ciclo 2 (pPA: 0.10, 95% CI 0.02 a 0.45). Los hogares que rechazaron el tratamiento en el Ciclo 1 no tuvieron una tendencia significativamente mayor o menor a participar en el Ciclo 2 (pPR: 1.48, 95% CI 0.36 a 6.09). Estos resultados fueron similares en la muestra por protocolo. Los niveles de participación a escala de sector son descritos en la Figura 2.

### **Análisis auxiliares y secundarios**

El ensayo del brazo de lotería para el Ciclo 1 en Cerro Colorado no resultó en diferencias significativas en la participación en comparación con la campaña de control (OR = 0.74, 95% CI 0.45 to 1.21, resultados no mostrados).

Nosotros hipotetizamos *a priori* que la intervención de planificación previa habría mejorado la eficiencia de la campaña al motivar a los hogares a prepararse mejor para la llegada de los rociadores, así reduciendo el tiempo que las brigadas de rociado gastarían en el hogar. En contraste con nuestra hipótesis, ninguna intervención de grupos requirió menos tiempo para ser rociado que en los hogares del grupo de control (Tabla 4). También hipotetizamos que las intervenciones motivarían a los hogares a participar más pronto en la campaña (sin haber requerido visitas adicionales de promotores o visitas de la brigada de rociado en los fines de semana o durante periodos de recuperación). En contraste, los hogares en el brazo de reclutamiento de líderes tuvieron menos probabilidades de ser rociados durante el periodo inicial de rociado comparado con los hogares en el control (pPA:0.68, 95% CI 0.55 to 0.83).

Un análisis exploratorio examinó la participación en el Ciclo 2 entre los hogares que habían rechazado el rociado en el Ciclo 1. (vs. haber sido una casa cerrada en la que nadie abrió la puerta al promotor o a la visita de rociado). En esta submuestra de 445 hogares, las chances de participación fueron 2.5 veces más altas en el brazo de tratamiento con planificación previa en comparación con los hogares en el control. (Tabla S1, pPA: 2.50, 95% CI 1.41 a 4.43).

El análisis de medidas de fidelidad indicó problemas mínimos con la entrega de las intervenciones. Por ejemplo, 66% de los hogares en el brazo de planificación previa quienes abrieron la puerta durante la visita de planificación, programaron una cita de rociado anticipada. En los sectores de reclutamiento de líderes en los que datos detallados fueron registrados para la actividad de los líderes de cuadra, los líderes fueron reclutados en todos los sectores, variando de

2 líderes por 73 hogares en un sector, a 8 líderes por 77 hogares en otro. Las listas de actividades para los líderes de cuadra registraron visitas y conversaciones con la mayoría de los hogares asignados. De las 135 casas que ganaron premios de lotería, todas menos 20 redimieron el cupón en la ferretería.

Comparamos las razones de rechazo al rociado en el Ciclo 2 a través de los diferentes brazos. Las dos razones más populares, cuáles fueron consistentes con nuestra investigación previa, fueron no tener tiempo para esperar en casa o perder un día de trabajo para acomodarse al rociado, y alergias (en casos de reacciones alérgicas al insecticida o por miedo de que miembros del hogar que tienen otras alergias tuvieran reacciones negativas al insecticida rociado). A través de los brazos de intervenciones, la falta de tiempo y disponibilidad fue mencionada menos veces en la planificación previa (17.5%) y grupos de lotería (17.7%) comparados con los brazos de control (27.0%) y el reclutamiento de líderes (30.5%). Las preocupaciones por alergias fueron más común en el control (14.3%) y planificación previa (14.0%) que en los brazos de reclutamiento de líderes de cuadra (10.2%) y las loterías de grupo contingentes (9.8%).

Determinamos las probabilidades de efectos de derrame y contaminación por medio de una encuesta en una submuestra de hogares en todos los brazos de tratamiento semanas después del rociado del Ciclo 2. Les preguntamos si habían sido conscientes de otras estrategias usadas por la campaña para aumentar la participación a parte de la estrategia a la que habían sido asignados. El conocimiento de ninguna de las otras estrategias fue alto 98.0% (control), 94.5% (planificación previa), 88.8% (reclutamiento de líder de cuadra), and 97.4% (loterías de grupo contingentes). Los brazos de planificación previa y reclutamiento de líderes de cuadra fueron los más informados acerca de la lotería; el brazo de la lotería fue el más informado acerca de la

planificación previa. Las otras estrategias reportadas por los hogares en el brazo de control no fueron estrategias puestas en lugar por el ensayo ni por la campaña.

## **DISCUSIÓN**

Pusimos a prueba el efecto de tres intervenciones basadas en comportamientos para aumentar la participación en una campaña de control de vectores de la enfermedad de Chagas en Arequipa, Perú, por medio de un ensayo sectorial aleatorio. El estudio fue motivado por la baja participación observada en distritos que habían sido recientemente rociados,<sup>19</sup> y por el potencial hipotético de estrategias informadas por economía comportamental. Cada una de las estrategias ensayadas- planificación previa, reclutamiento de líderes de cuadra, y loterías de grupo contingentes- fue diseñada para responder a ciertos obstáculos comportamentales en la participación de hogares. En nuestro ensayo de casi 5,000 hogares en el segundo ciclo de la aplicación puerta a puerta de insecticida, ninguna de las estrategias mejoraron la participación en relación con la campaña usual. En otra muestra de hogares en un distrito diferente, quienes se encontraban en el primer ciclo del rociado, la intervención de lotería tampoco mejoró la participación en comparación con el control. Adicionalmente, estas estrategias no redujeron la cantidad de tiempo necesaria para rociar cada hogar, ni mejoraron el ritmo con el que los hogares acordaban con el ser rociados. La única mejora significativa en participación y asociada con las estrategias informadas por comportamientos (en un análisis exploratorio) fue una probabilidad 2.5 veces más alta de participación en el brazo de planificación previa comparado con el control, únicamente entre los hogares que habían rechazado la participación en el primer ciclo del rociado. Esto es consistente con las limitaciones de tiempo y disponibilidad que fueron la razones más populares para rechazar la participación en la campaña.

Nuestros resultados contribuyen a una literatura limitada acerca de estrategias para mejorar la participación en esfuerzos de control de vectores basados en comunidades. La mayoría de trabajos previos en esta área contiene estudios de observación acerca de las percepciones de comunidades en cuanto a esfuerzos de control de vectores incluyendo campañas de rociado con insecticida de efecto residual. Investigaciones previas sugieren que las decisiones de participación son frecuentemente guiadas por factores que no son prevención de enfermedades, particularmente, el deber ciudadano.<sup>63 64</sup> La mayoría de obstáculos a la participación citados incluyen el miedo de robo durante las actividades de control,<sup>65</sup> olores y reacciones alérgicas al insecticida,<sup>66</sup> y retos logísticos.<sup>67 68</sup> A pesar de que el involucramiento comunitario y actividades de movilización han sido asociados con tasas mayores en participación,<sup>69-71</sup> estas estrategias no han sido evaluadas en un ensayo aleatorio.

Señalamos dos factores que pueden haber contribuido a nuestro hallazgo de no efecto. Primero, nuestras intervenciones fueron diseñada inicialmente para aumentar la participación en el Ciclo 1 del rociado de insecticida, es decir, en un distrito “ingenuo a la campaña”. Sin embargo, por razones logísticas y de práctica relacionadas con el calendario y el progreso de la campaña, condujimos el ensayo durante el Ciclo 2, cuando los hogares ya tenían experiencia con la promoción y el mensaje de la campaña, y ya habían decidido en cuanto a su participación previamente. (Notamos que esto no es válido para nuestro análisis auxiliar de la intervención de lotería o. el control conducido durante el Ciclo 1 en un distrito vecino, el cual tampoco experimentó un aumento en participación.)

Segundo, nuestro ensayo también fue afectado por un aumento inesperado conseguido en la participación en los dos ciclos de rociado y a través de todos los brazos.<sup>19</sup> Esto fue parcialmente endógeno a este ensayo: mientras proveemos el personal entrenado para asistir en la promoción

de la campaña, tal como lo hemos hecho previamente, esta fue la primera vez en que nuestro equipo de investigación estaba particularmente enfocado en mejorar la participación (en lugar de simplemente observando las modalidades de infestación). También sospechamos que los efectos Hawthorne hayan tenido un papel en este escenario, ya que el personal de campo fue monitoreado cuidadosamente por nuestro equipo de investigación durante todas las actividades de la campaña y a través de todos los brazos del estudio. Un factor adicional que resultó en tasas de participación de casi 80% a través de los brazos del estudio emergió a mediados del ensayo en nuestro distrito de estudio. En un esfuerzo para mantener el progreso de la campaña, el MINSA decidió requerir que las brigadas de rociado consiguieran el 80% de participación antes de considerar una localidad como completada. Esta directiva implementó un límite en los niveles de participación- cuando el 80% de cobertura se alcanzaba, las brigadas eran enviadas a una nueva localidad.

Mientras nuestros brazos de estudio fueron distribuidos aleatoriamente a través de las localidades, el efecto de esta cuota *ad hoc* al nivel de localidad fue el disminuir el poder de nuestro estudio al homogeneizar la cobertura y comprimir las oportunidades para cualquier brazo de exceder esta cuota. Aunque esta regla de cuotas no fue una regla oficial ni formalizada en el protocolo de campaña, sin embargo fue utilizada en el campo por el personal de campaña. Esto es un recordatorio de la naturaleza pragmática de este tipo de ensayo a gran escala y los retos que se presentan para mantener la fidelidad del protocolo. Una de las ventajas importantes de este enfoque pragmático, es su fuerte validez externa. Mientras los ensayos que incorporaron incentivos monetarios son a menudo criticados por no ser ampliables o generalizables, nuestro argumento es que el diseño de nuestros incentivos de lotería y nuestra colaboración con el Ministerio de Salud durante todas las fases del ensayo se aseguraron que si hubieran sido

exitosos, los incentivos de loterías se podrían haber implementado en la campaña de Arequipa y en otros lugares.

El despliegue rápido de dispositivos móviles y aplicaciones en el campo de la salud global también hace que la programación de respuestas comunitarias y el despacho en su momento de brigadas de rociado más factible, aún en circunstancias de bajos recursos. Nuestra estrategia de líderes de cuadra fue un ejemplo específico del uso extensivo de trabajadores de salud pública<sup>72</sup> y el aprovechamiento intencional de capital social y redes sociales para apoyar el cambio de comportamientos en cuanto a la salud.<sup>73</sup> Evaluaremos la posibilidad de generalizar nuestras estrategias en análisis de coste-eficacia, respuesta de hogares a las estrategias planteadas, y amontonamiento de motivación para participar en campañas de salud pública asociadas con el recibimiento de incentivos monetarios.<sup>74-76</sup>

Nuestro estudio es uno de los primeros en implementar un enfoque de diseño comportamental en el desarrollo y evaluación de estrategias para programas de salud global que incluyen control de vectores. Nuestras intervenciones fueron motivadas por nuestro trabajo previo, el cual sugirió que los hogares son más probables a aceptar el tratamiento de insecticidas cuando los vecinos también habían participado, que aquellos hogares que fueron incomodados por las logísticas de la campaña actual, y que los hogares no tenían conocimiento acerca del riesgo y transmisión de la Enfermedad de Chagas.<sup>19 55</sup> Nuestro fracaso al aumentar la participación significativamente pudo haber emergido a ciertos puntos en el proceso de diseño comportamental en este contexto: Primero, puede que las brechas en participación en la campaña no fueran debido a obstáculos comportamentales, y que por tanto fueran debido a barreras estructurales - es decir, puede que este problema no pueda ser resuelto con percepciones comportamentales. Basados en nuestra experiencia previa con esta campaña y nuestro trabajo formativo, creemos que esto no es posible.

Segundo, puede ser que no hayamos diagnosticado estos problemas comportamentales correctamente en nuestro trabajo formativo, o que hayamos emparejado mal nuestro diseño de intervención (empleando estrategias de economía conductual) con los obstáculos comportamentales que se presentaban en la participación de los hogares en Arequipa. Esto es sin duda posible, y se necesitan ajustes adicionales y la sistematización de los pasos de diagnóstico y diseño comportamental para asegurar un emparejamiento robusto de las intervenciones informadas por comportamientos y los comportamientos meta. Es posible que nuestras intervenciones hayan sido emparejadas apropiadamente con los embotellamientos comportamentales, pero que su dosis o relevancia no haya sido lo suficiente para crear una diferencia sustancial. Por ejemplo, en este ensayo pragmático no pudimos poner a prueba si más visitas del líder de cuadra o un premio de lotería más grande hubiera hecho una diferencia. Por último, puede que la fidelidad a las intervenciones haya sido imperfecta, llevando a confusión y desentendimiento entre los miembros del hogar a pesar de nuestros esfuerzos al describir las intervenciones en términos claros y simples; aún así, nuestras medidas de fidelidad no sugieren que este haya sido el caso. Fundamentalmente, nuestros resultados nulos pueden reflejar los aspectos prácticos de la implementación de intervenciones factibles en el contexto de una campaña en curso del Ministerio de Salud. Varias intervenciones que fueron desarrolladas al principio de nuestro proceso fueron abandonadas debido a su baja viabilidad y admisibilidad.<sup>57</sup>

## **Limitaciones**

Debido a la naturaleza pragmática de este estudio, se presentaron ciertas desviaciones de las operaciones de campaña y de nuestro plan para el ensayo. Estas incluyeron el personal adicional para la campaña proveído por el equipo de estudio y la cuota de participación *ad hoc* al nivel de localidades descrita previamente. Adicionalmente, el distrito del ensayo experimentó el paro de

la campaña varias veces, debido a demoras por el clima, eventos promocionales especiales, y brotes activos de rabia canina.<sup>77</sup> Aún así, no tenemos razones suficientes para sospechar que estos factores afectaron los brazos de estudio en diferentes maneras. A pesar de la atención cuidadosa a la asignación de sectores para cada brazo del estudio, el brazo de reclutamiento de líderes de cuadra terminó con un número desproporcionado de propiedades abandonadas y lotes vacíos; en relación, nuestro equipo también observó de manera anecdótica que varios de los sectores de reclutamiento de líderes de cuadra presentaron bajo capital social y conexión social, lo cual hizo el reclutamiento de líderes de cuadra desafiante. Aunque nuestro diseño introdujo la posibilidad de derrame y contaminación, pocos hogares reportaron conocimiento de otras intervenciones en la campaña (e.g., loterías o planificación previa) que ellos no recibieron.

## **Conclusiones**

Conseguir altos niveles de participación es radical para esfuerzos de prevención de enfermedades basados en la comunidad, incluyendo esfuerzos de campañas puerta a puerta para el control de vectores. Nuestro ensayo de estrategias informadas por comportamientos para aumentar la participación no fue exitoso en este esfuerzo, con la posible excepción de haber influenciado a los hogares que se habían rehusado a participar previamente. Este ensayo ofrece lecciones para investigadores y practicantes acerca de cómo el proceso de diseño de intervenciones (particularmente el entendimiento de las barreras en contra de la participación visto desde un lente comportamental) está relacionado con los desafíos de ensayos pragmáticos en programas de salud existentes. Una gran ventaja de los ensayos pragmáticos es que estos examinan la eficacia en práctica, aunque esto resulta con frecuencia en efectos de talla más pequeña que en estudios de eficacia con mayor control en cuanto al diseño y despliegue de intervenciones. Nuestros resultados también nos impulsan a pensar en los efectos de tratamientos heterogéneos a fin de

ajustar y dirigir intervenciones, particularmente en programas de gran escala. Continuamos optimistas acerca del potencial de la aplicación de conocimiento comportamental en campañas de salud global en las que el involucramiento de hogares es fundamental para su éxito, y continuaremos aplicando este enfoque de estrategias en nuestras investigaciones continuas en el control de vectores y pestes, vacunación canina contra la rabia y anemia infantil.

## **APORTES DEL ESTUDIO**

### **Conocimiento del tema**

- La baja participación comunitaria en las campañas de control de vectores puede amenazar la efectividad de la campaña.
- Las barreras en la participación observadas y mencionadas incluyen altos niveles de costos por inconveniencia, baja percepción de los peligros de la enfermedad, ninguna consecuencia percibida al rehusarse a la campaña, falta de conocimiento acerca de la participación de los vecinos.

### **Aporte del estudio**

- Aplicamos economía comportamental al diseño de tres intervenciones para aumentar la participación en una campaña de control de vectores de la enfermedad de Chagas por medio del tratamiento directo de obstáculos comportamentales.
- En nuestro estudio, ninguna de las intervenciones consiguió participación más alta en comparación con la campaña continua del Ministerio de Salud.
- Esfuerzos subsecuentes podrían dirigir ciertos conocimientos de la economía comportamental con fin de diseñar intervenciones de cambio de comportamiento de salud en programas públicos y de salud comunitaria.

## **RECONOCIMIENTOS**

Este estudio fue financiado por el Eunice Kennedy Shriver National Institute of Child Health and Human Development (R01HD075869). Los autores agradecen a los miembros del Chagas Disease Working Group en Arequipa, Blgo. Fernando Málaga, Blgo. Andy Catacora, Dr. Juan Cornejo del Carpio y Dr. Woodward Paja quienes contribuyeron y facilitaron la realización de este trabajo. Reconocemos con gratitud las contribuciones invaluable del Ministerio de Salud del Perú (MINSA), la Dirección General de Salud de las Personas (DGSP), la Estrategia Sanitaria Nacional de Prevención y Control de Enfermedades Metaxénicas y Otras Transmitidas por Vectores (ESNPCEMOTVS), la Dirección General de Salud Ambiental (DIGESA), el Gobierno Regional de Arequipa, y la Gerencia Regional de Salud de Arequipa (GRSA).

## **ACKNOWLEDGEMENTS**

This study was funded by the Eunice Kennedy Shriver National Institute of Child Health and Human Development (R01HD075869). The authors thank the members of the Chagas Disease Working Group in Arequipa who contributed and facilitated this work include Fernando Malaga, Andy Catacora, Juan Cornejo del Carpio, and Woodward Paja. We gratefully acknowledge the invaluable contributions of the Ministerio de Salud del Perú (MINSA), the Dirección General de Salud de las Personas (DGSP), the Estrategia Sanitaria Nacional de Prevención y Control de Enfermedades Metaxenicas y Otras Transmitidas por Vectores (ESNPCEMOTVS), the Dirección General de Salud Ambiental (DIGESA), the Gobierno Regional de Arequipa, and the Gerencia Regional de Salud de Arequipa (GRSA).

## **CONTRIBUYENTES**

AMB, MZL, VPS, RCN, KGV, JRB, CNV y MZL contribuyeron a la conceptualización y diseño del ensayo. Todos los autores contribuyeron en el diseño de intervenciones y la implementación

del ensayo. AMB, VPS, TCN, ATV, KBM, MM, CAN, y MZL contribuyeron significativamente a la adquisición de datos. AMB, RCN, CAN, DSS, y MZL condujeron la limpieza y análisis de datos. Todos los autores proveyeron comentarios en las versiones del artículo y aprobaron esta versión para su presentación.

## **FINANCIAMIENTO**

Este estudio fue financiado por un subsidio del Eunice Kennedy Shriver National Institute of Child Health and Human Development (R01HD075869). El apoyo para el trabajo formativo y el piloto fue proveído por subsidios de University of Pennsylvania's University Research Foundation and Global Engagement Fund. Los financiadores de este estudio no tuvieron ningún papel en el diseño, colección de datos, análisis de datos, escritura del reporte, o la decisión de presentar este artículo para publicación.

**CONFLICTO DE INTERESES** Los autores declaran que no tienen conflicto de intereses

## **APROBACIÓN ETICA**

La aprobación ética fue obtenida por el Comité de Revisión Institucional de la Universidad Peruana Cayetano Heredia, la University of Pennsylvania y Tulane University.

## **INTERCAMBIO DE DATOS**

El conjunto de datos completo y código estadístico están disponibles y a disposición del autor correspondiente.

## **LEYENDAS DE FIGURAS**

Figura 1. CONSORT Diagrama de Flujo

Figura 2: Mapa mostrando las tasas de participación a nivel de sectores en el Ciclo 2 de la campaña de rociado con insecticida en control de vectores de la Enfermedad de Chagas divididas en los brazos de intervenciones, Distrito Alto Selva Alegre, Arequipa, Perú.
